# Supplementary material for: Integration of single Co atoms and Ru nanoclusters boosts the cathodic performance of nitrogen-doped 3D graphene in lithium–oxygen batteries
Source: Royal Society of Chemistry journal article supplement (doi:10.1039/d1ta00538c), 2021-01-01
Supplement: d1ta00538c1.pdf [file d1ta00538c1.pdf]

## Supporting Information

### **Integration of Single Co Atoms and Ru Nanoclusters Boosts the Cathodic Performance of Nitrogen-Doped 3D Graphene towards Lithium–Oxygen Batteries**

*Mingrui Liu<sup>a</sup>, Jing Li<sup>b</sup>, Bin Chi<sup>a</sup>, Long Zheng<sup>a</sup>, Yuexing Zhang<sup>c</sup>, Qinghua Zhang<sup>c</sup>, Tang Tang<sup>d</sup>, Lirong  
Zheng<sup>e</sup>, Shijun Liao<sup>a,\*</sup>*

---

\*Corresponding author, e-mail: [chsjliao@scut.edu.cn](mailto:chsjliao@scut.edu.cn), fax +86-20-87113586

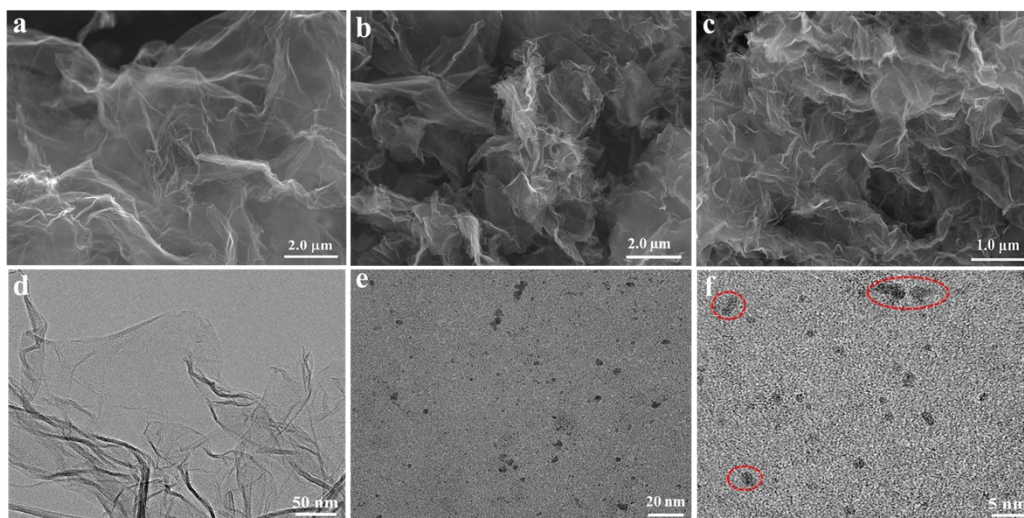

**Figure S1.** The SEM and TEM images of (a), (d) 3DNG, (b), (e) Co/ 3DNG, (c), (f) Ru<sub>NC</sub>/3DNG

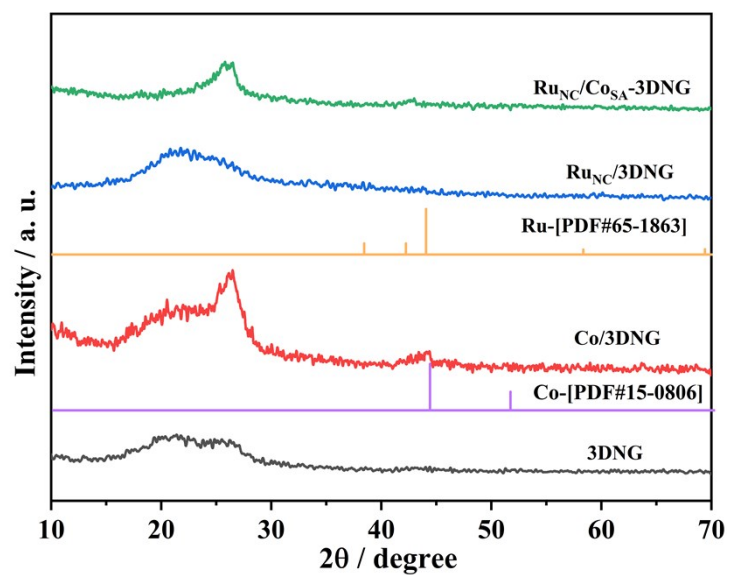

**Figure S2.** The XRD patterns of the 3DNG, Co/3DNG, Ru<sub>NC</sub>/3DNG and Ru<sub>NC</sub>/Co<sub>SA</sub>-3DNG samples.

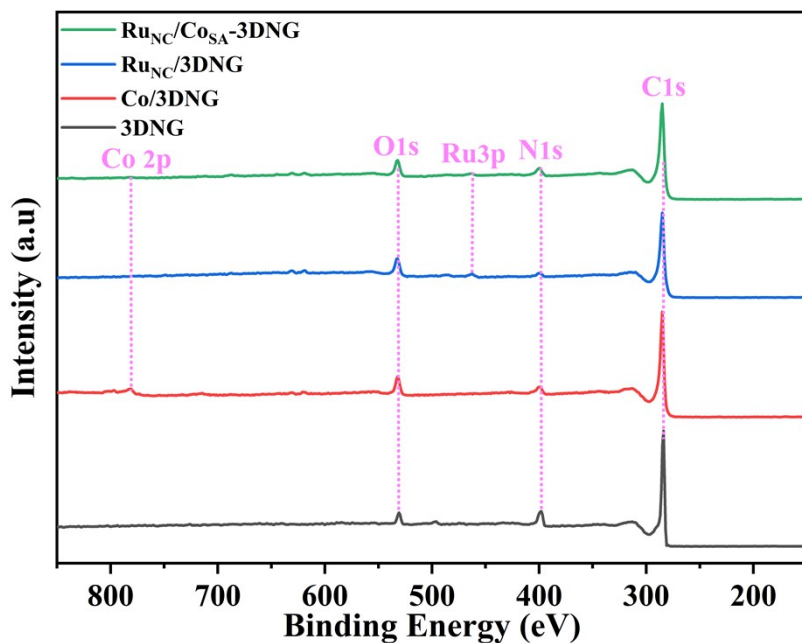

Figure S3. XPS survey spectra of 3DNG, Co/3DNG, Ru<sub>NC</sub>/3DNG and Ru<sub>NC</sub>/Co<sub>SA</sub>-3DNG.

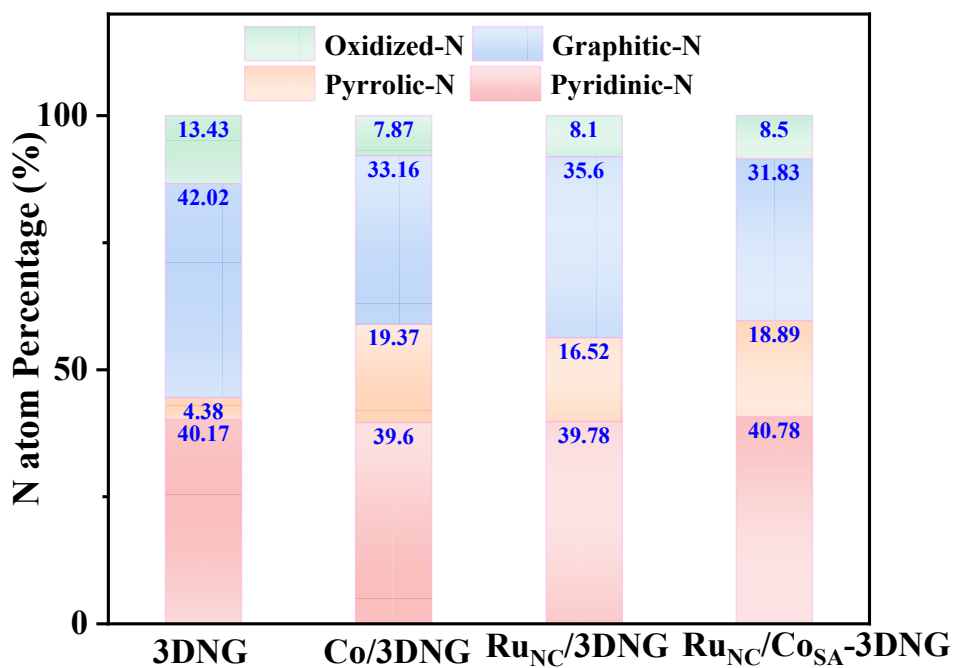

Figure S4. The distribution of the different N species.

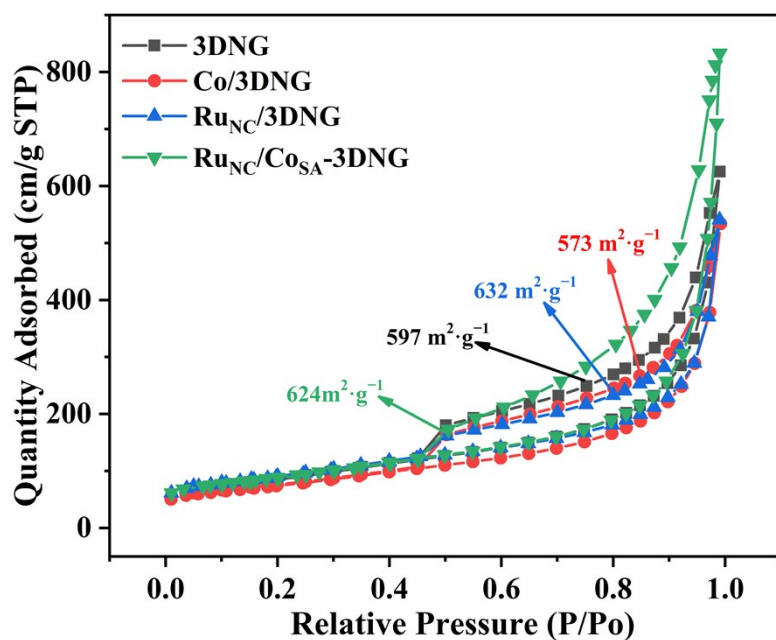

**Figure S5.** The nitrogen adsorption/desorption isotherms and pore size distribution of 3DNG, Co/3DNG, Ru<sub>NC</sub>/3DNG and Ru<sub>NC</sub>/Co<sub>SA</sub>-3DNG.

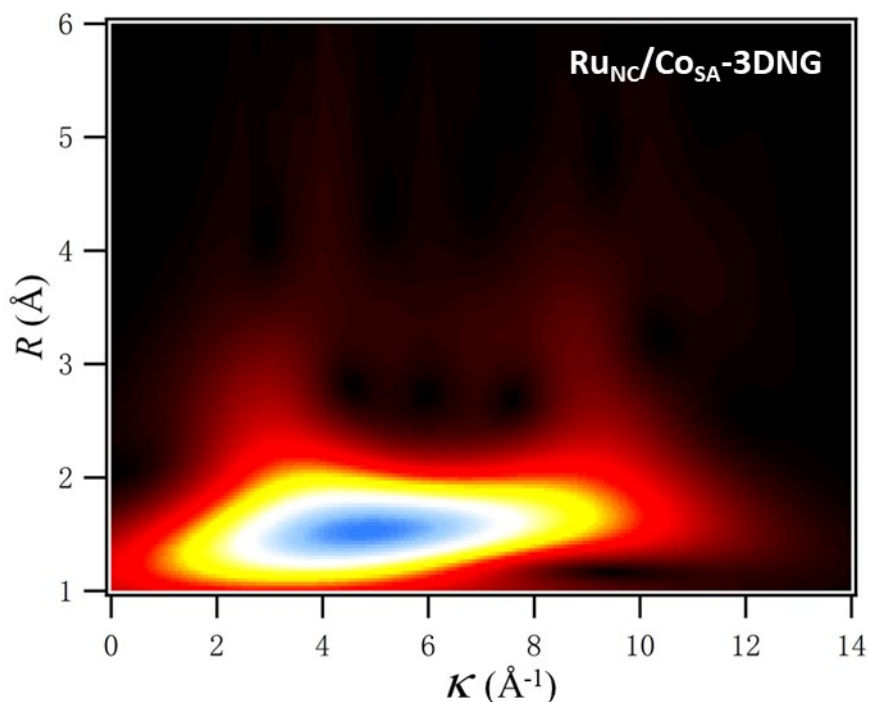

**Figure S6.** Wavelet transforms for the  $k^3$ -weighted Co K-edge EXAFS signals of Ru<sub>NC</sub>/Co<sub>SA</sub>-3DNG. The maxima at  $4.5 \text{ \AA}^{-1}$  is associated with the Co-N contributions.

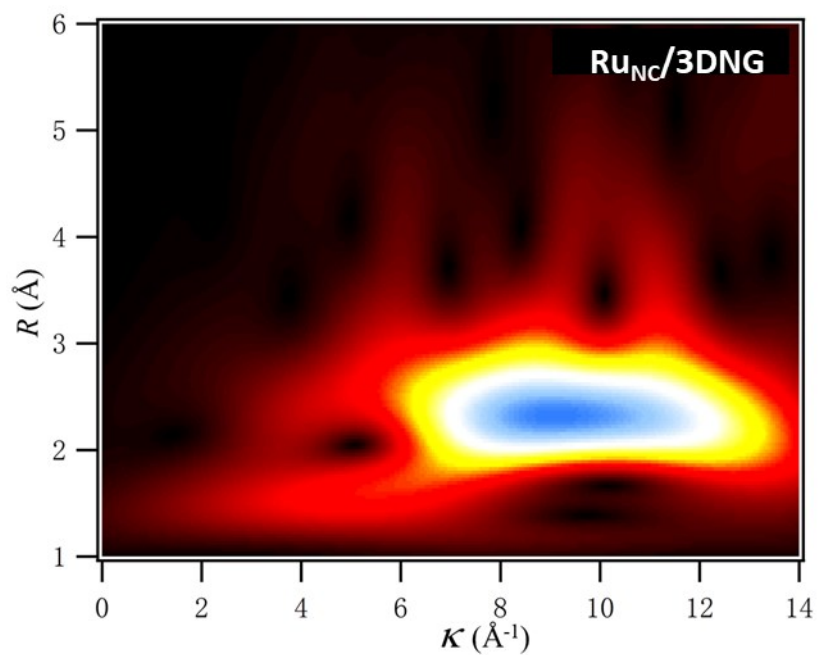

**Figure S7.** Wavelet transforms for the  $k^3$ -weighted Ru K-edge EXAFS signals of Ru<sub>NC</sub>/3DNG. Ru<sub>NC</sub>/3DNG shows a maximum at  $9.3 \text{ Å}^{-1}$ , which indicates the dominance of metallic Ru nano crystallites.

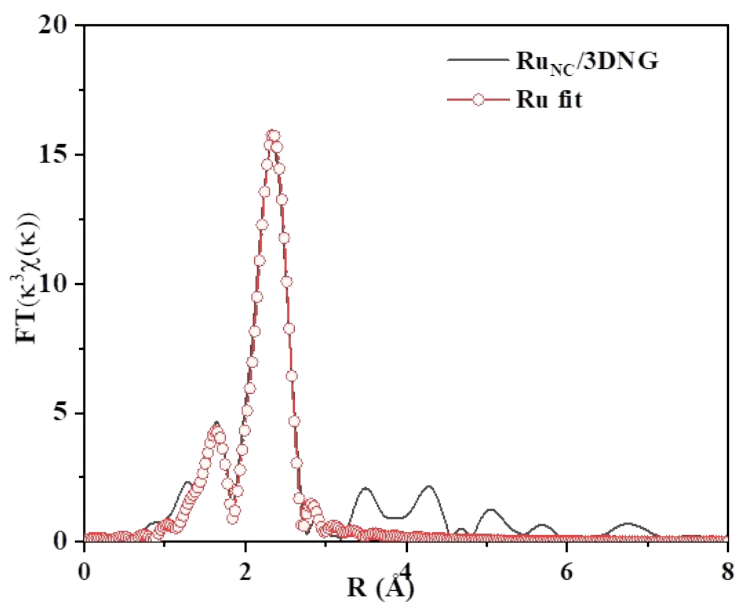

**Figure S8.** R space Fitting result of Ru K-edge of Ru<sub>NC</sub>/3DNG.

**Table S1.** EXAFS fitting results of Ru<sub>NC</sub>/Co<sub>SA</sub>-3DNG from Figure 3c-f

| Sample                                   | Shell  | N <sup>a</sup> | R (Å)<br><sup>b</sup> | $\sigma^2$ (Å <sup>2</sup> ·10 <sup>-3</sup> )<br><sup>c</sup> | $\Delta E_0$<br>(eV) <sup>d</sup> | R factor<br>(%) |
|------------------------------------------|--------|----------------|-----------------------|----------------------------------------------------------------|-----------------------------------|-----------------|
| Ru <sub>NC</sub> /Co <sub>SA</sub> -3DNG | Co-N/O | 6.0            | 2.08                  | 9.1                                                            | 0.3                               | 0.3             |
|                                          | Co-Co  | 0.5            | 2.42                  | 10.1                                                           | -0.2                              |                 |
|                                          | Ru-N   | 4.1            | 2.05                  | 7.8                                                            | 3.5                               | 1.3             |
|                                          | Ru-Ru  | 0.7            | 2.53                  | 7.0                                                            | -0.6                              |                 |
| Ru <sub>NC</sub> /3DNG                   | Ru-N   | 1.3            | 2.02                  | 1.4                                                            | -0.5                              | 0.8             |
|                                          | Ru-Ru  | 6.4            | 2.67                  | 6.7                                                            | -6.2                              |                 |

<sup>a</sup>N: coordination numbers; <sup>b</sup>R: bond distance; <sup>c</sup> $\sigma^2$ : Debye-Waller factors; <sup>d</sup> $\Delta E_0$ : the inner potential correction. R factor: goodness of fit. S02 were set as 0.89/0.90 for Co-O/Co-Co, which were obtained from the experimental EXAFS fit of reference CoO/Co foil by fixing CN as the known crystallographic value and was fixed to all the samples. S02 were set as 0.85/0.90 for Ru-N/O, Ru-Ru, which were obtained from the experimental EXAFS fit of reference RuO<sub>2</sub>/Ru powder by fixing CN as the known crystallographic value and was fixed to all the samples.

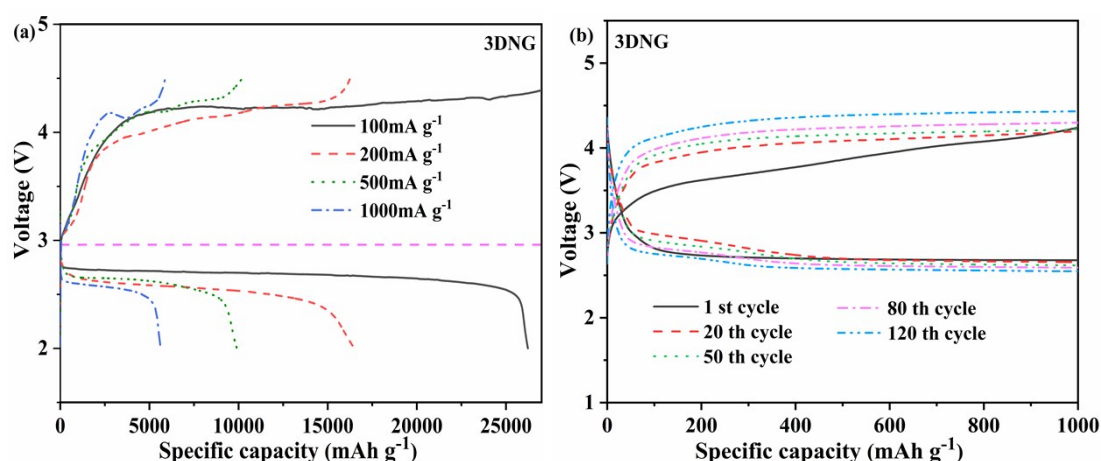

**Figure S9.** The rate performance of 3DNG cathode (2.0-4.5 V), and corresponding discharge-charge voltage profiles different cycles under specific capacity limit of 1000 mAh g<sup>-1</sup> at a rate of 200 mA g<sup>-1</sup>.

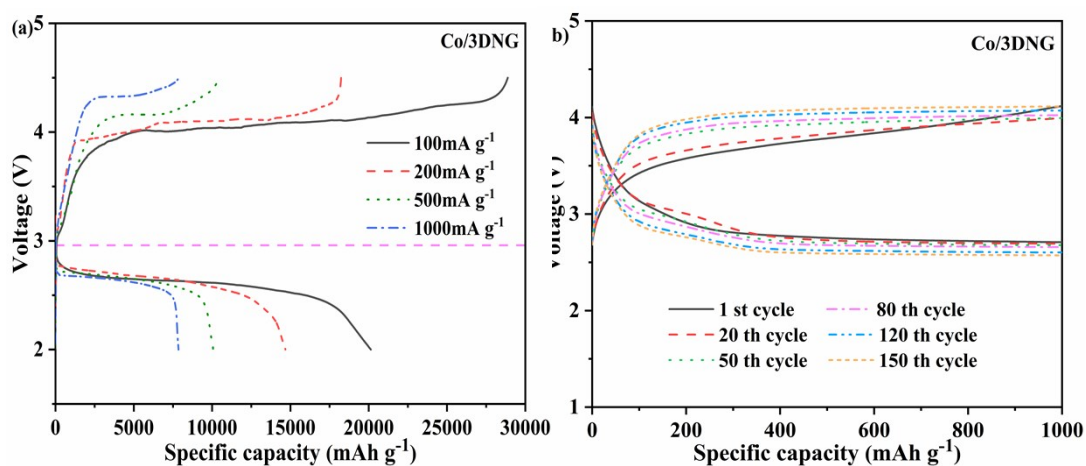

**Figure S10.** The rate performance of Co/3DNG cathode (2.0-4.5V), and corresponding discharge-charge voltage profiles different cycles under specific capacity limit of 1000 mAh g<sup>-1</sup> at a rate of 200 mA g<sup>-1</sup>.

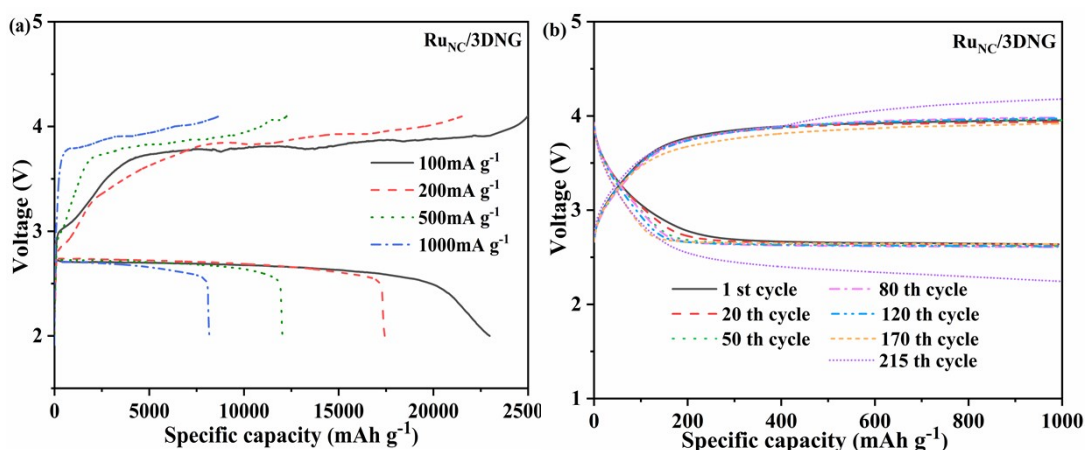

**Figure S11.** The rate performance of Ru<sub>NC</sub>/3DNG cathode (2.0-4.1V), and corresponding discharge-charge voltage profiles different cycles under specific capacity limit of 1000 mAh g<sup>-1</sup> at a rate of 200 mA g<sup>-1</sup>.

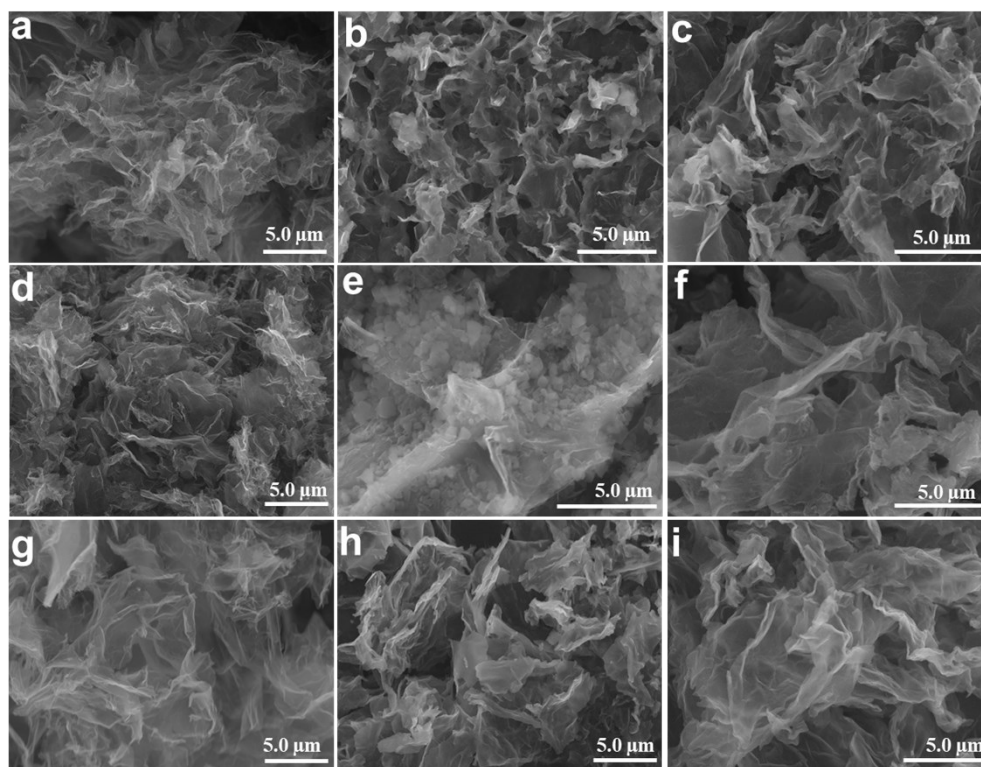

**Figure S12.** SEM images of pristine, discharged (2.0 V) and subsequent recharged (to 4.3V) cathodes of 3DNG ( a, b, c ), Co/3DNG ( d, e, f ), Ru<sub>NC</sub>/3DNG ( g, h, I )

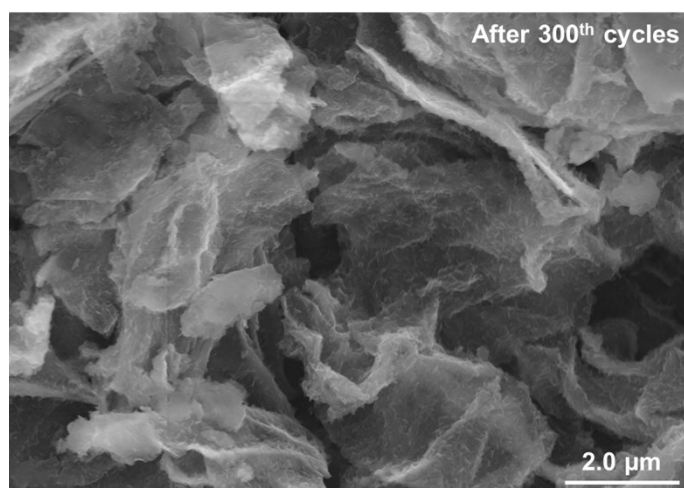

**Figure S13.** SEM images of Ru<sub>NC</sub>/Co<sub>SA</sub>-3DNG cathode after 300<sup>th</sup> cycles of discharge and charge process



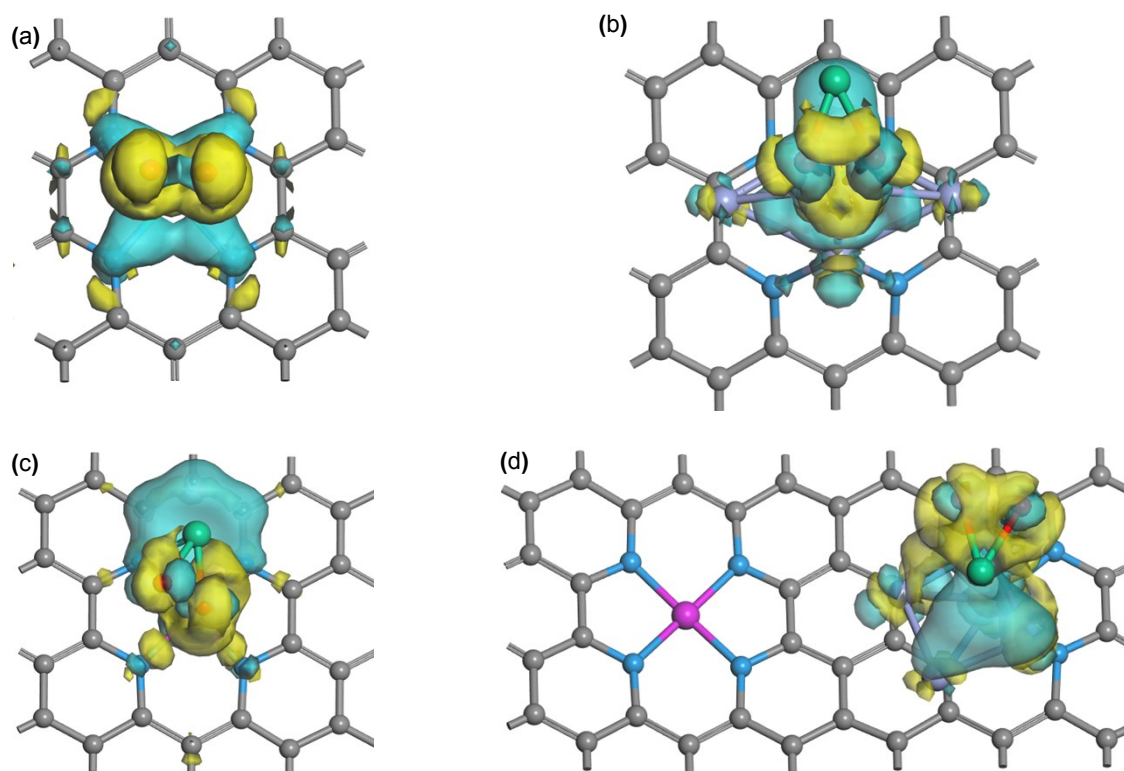

**Figure S14.** 3D plots of the charge density difference of the  $\text{LiO}_2$  molecule adsorption on (a) 3DNG, (b)  $\text{Ru}_{\text{NC}}/3\text{DNG}$ , (c) single Co atoms and (d) Ru clusters of  $\text{Ru}_{\text{NC}}/\text{Co}_{\text{SA}}\text{-3DNG}$ . The yellow and green isosurfaces represent the electron gain and lose, respectively. The corresponding isosurface value is  $0.002 \text{ e}/\text{Bohr}^3$ .

**Table S2.** Comparison of specific capacity for various Ru/graphene-based cathodes.

| Cathode                   | Mass loading (wt.%) | Current density (mA/g)        | Discharge Capacity (mAh/g)   | Discharge Capacity overpotential | references |
|---------------------------|---------------------|-------------------------------|------------------------------|----------------------------------|------------|
| Ru@ Porous graphene       | 20.34               | 200                           | 17700                        | 0.35 V                           | [1]        |
| Ru-graphene aerogels      | 18                  | $0.1 \text{ mA}/\text{cm}^2$  | 12000                        | 1.25 V                           | [2]        |
| Ru@ VGNS@ Ni foam         | 43                  | 200                           | 23864                        | 0.86 V                           | [3]        |
| Ru-FeCoN/rGO              | 20                  | 200                           | 23905                        | $\sim 1.0 \text{ V}$             | [4]        |
| Ru@MPG                    | 30                  | 200                           | 6433                         | $\sim 1.0 \text{ V}$             | [5]        |
| Ru/N-CNf@TiO <sub>2</sub> | 20.3                | $0.15 \text{ mA}/\text{cm}^2$ | $2.0 \text{ mAh}/\text{m}^2$ | $\sim 0.94 \text{ V}$            | [6]        |
| Ru/3D-NrGO                | 9.37                | 200                           | 18727                        | 0.88 V                           | [7]        |
| Ru QD/NHG                 | --                  | 300                           | 2700                         | 1.04 V                           | [8]        |
| $\text{Ru}_{0.3}$ SAs-NC  | 2.48                | $0.02 \text{ mA}/\text{m}^2$  | 13424                        | 1.37 V                           | [9]        |

|                                             |             |            |              |               |                  |
|---------------------------------------------|-------------|------------|--------------|---------------|------------------|
| Ru@MWCNTP                                   | 9.0         | 500        | ~27000       | 1.04 V        | [10]             |
| <b>Ru<sub>NC</sub>/Co<sub>SA</sub>-3DNG</b> | <b>8.82</b> | <b>100</b> | <b>25632</b> | <b>0.84 V</b> | <b>This work</b> |

**Table S3.** Comparison of cycling stability for various Ru/graphene-based cathodes.

| Cathode materials                           | Current density (mA/g) | Discharge Capacity (mAh/g) | Cycling numbers | overpotential  | references       |
|---------------------------------------------|------------------------|----------------------------|-----------------|----------------|------------------|
| Ru@ Porous graphene                         | 200                    | 1000                       | 200             | ~0.94 V        | [1]              |
| Ru-graphene aerogels                        | 0.1mA/cm <sup>2</sup>  | 500                        | 50              | ~1.04 V        | [2]              |
| Ru@ VGNS@ Ni foam                           | 200                    | 1000                       | 200             | ~0.23 V        | [3]              |
| Ru-FeCoN/rGO                                | 200                    | 600                        | 300             | ~1.04 V        | [4]              |
| Ru@MPG                                      | 100                    | 500                        | 55              | ~1.24 V        | [5]              |
| Ru/N-CNFs@TiO <sub>2</sub>                  | 500                    | 1000                       | 132             | ~1.24 V        | [6]              |
| Ru/3D-NrGO                                  | 200                    | 1000                       | 200             | ~1.04 V        | [7]              |
| Ru QD/NHG                                   | 300                    | 500                        | 20              | ~0.85 V        | [8]              |
| Ru <sub>0.3</sub> SAs-NC                    | 0.02mA/m <sup>2</sup>  | 1000                       | 60              | ~1.29 V        | [9]              |
| Ru@MWCNTP                                   | 500                    | 5000                       | 50              | ~1.31 V        | [10]             |
| <b>Ru<sub>NC</sub>/Co<sub>SA</sub>-3DNG</b> | <b>200</b>             | <b>1000</b>                | <b>300</b>      | <b>~1.02 V</b> | <b>This work</b> |

#### References:

- [1] B. Sun, X. Huang, S. Chen, P. Munroe, G. Wang, *Nano Lett.* 2014, 14, 3145.
- [2] J. Jiang, P. He, S. Tong, M. Zheng, Z. Lin, X. Zhang, Y. Shi, H. Zhou, *NPG Asia Materials* 2016, 8, e239.
- [3] D. Su, D. Han Seo, Y. Ju, Z. Han, K. Ostrikov, S. Dou, H.-J. Ahn, Z. Peng, G. Wang, *NPG Asia Materials* 2016, 8, e286.
- [4] X. Zeng, C. You, L. Leng, D. Dang, X. Qiao, X. Li, Y. Li, S. Liao, R. R. Adzic, *J. Mater. Chem. A* 2015, 3, 11224.
- [5] X. Lin, Y. Cao, S. Cai, J. Fan, Y. Li, Q.-H. Wu, M. Zheng, Q. Dong, *J. Mater. Chem. A* 2016, 4, 7788.
- [6] J. Yang, H. Mi, S. Luo, Y. Li, P. Zhang, L. Deng, L. Sun, X. Ren, *J. Power Sources*

2017, 368, 88.

[7] M. Liu, K. Sun, Q. Zhang, T. Tang, L. Huang, X. Li, X. Zeng, J. Hu, S. Liao, ACS Sustainable Chem. Eng. 2020, 8, 6109.

[8] M. Nazarian-Samani, H.-D. Lim, S. Haghghat-Shishavan, H.-K. Kim, Y. Ko, M.-S. Kim, S.-W. Lee, S. F. Kashani-Bozorg, M. Abbasi, H.-U. Guim, D.-I. Kim, K.-C. Roh, K. Kang, K.-B. Kim, J. Mater. Chem. A 2017, 5, 619.

[9] X. Hu, G. Luo, Q. Zhao, D. Wu, T. Yang, J. Wen, R. Wang, C. Xu, N. Hu, J. Am. Chem. Soc. 2020, 142, 16776.

[10] F. Li, Y. Chen, D.-M. Tang, Z. Jian, C. Liu, D. Golberg, A. Yamada, H. Zhou, Energy Environ. Sci. 2014, 7, 1648.
